# Supplementary material for: Serpentoviruses Exhibit Diverse Organization and ORF Composition with Evidence of Recombination
Source: MDPI journal article supplement (doi:10.3390/v16020310), 2024-02-18
Supplement: s1 [file s1]

**Supplemental Table 1.** Primers and conditions used for rtPCR to bridge gaps between Illumina MiSeq next-generation sequencing fragments of novel serpentoviruses.

| Virus                                          | Sense Primer                                         | Antisense Primer                                      | Amplicon Size | Annealing Temp (°C) |
|------------------------------------------------|------------------------------------------------------|-------------------------------------------------------|---------------|---------------------|
| [OR131601-602]<br>Green Tree<br>Python Isolate | GT1132F (5'- TCA CAA<br>GAG TCG TCA AGG GC-3')       | GT1911R (5'- CCG ACT CGG<br>TGG CTA AAA CT-3')        | 600           | 56                  |
|                                                | GT3104F (5'- TGC CTG TAA<br>AGA CAA CGG GAA-3')      | GTDegRev1 (5'- CAN NAA<br>UGU UGG CCU CUC CA-3')      | 400           | 59                  |
| [OR131606-607]<br>Papuan Python                | Pap16108F (5'-GGC CAC<br>ACT ACA ACC GTG AT-3')      | Pap16656R (5'- GGG AGT<br>TGT TGA TGC GTT GG-3')      | 560           | 56                  |
|                                                | Pap18966F (5'-TGG CTC<br>GTG CTT GTA GGA AG-3')      | Pap19417R (5'- TGC GAC<br>ATT CGT GAG GTC TT-3')      | 330           | 55                  |
|                                                | Pap24006F (5'-TTG AGT<br>TGT CCT GAA GTG ACA-<br>3') | Pap24231R (5'- AGC TAA<br>GTC AGG TGA TGG TGT-<br>3') | 200           | 52                  |
| [OR131601-602]<br>Bredl's Python               | BR5986F (5'-TCA GAA GAC<br>CAG GAC CAT GA-3')        | BR6212R (5'-TGG TGT TGC<br>AGT TGC TGT TG-3')         | 113           | 54                  |
|                                                | BR25512F (5'-AGT AAG<br>CAG GAA GAG CTC TGT-<br>3')  | BR25842R (5'-TCG GCA TCC<br>ACT TGA CTA AGA-3')       | 300           | 54                  |

**Supplemental Table 2.** Overview of nidovirus genomes used in serpentovirus genome characterization. Genbank accession numbers are organized by viral genus or subgenus as necessary. Associated hosts and genome overview are given for each viral group. The length of each genome section in kilobases is shown on the top line for each genome section. The second line for Open Reading Frames (ORFs) sections show the corresponding coded protein, labeled with ORF number as a subscript. Proteins common between all viruses are italicized. Untranslated Regions (UTRs) are labeled with the coronavirus genera ( $\alpha$ ,  $\beta$ ,  $\gamma$  or  $\delta$ ) that modeled an appropriate UTR region structure using serpentovirus UTR sequence.

| Genus<br>(Subgenus) | Accession #                                                                                                                                                                                                                                                                                                                                                                                                                                                                                                                                                                          | Hosts                     | 5'<br>UTR | ORF<br>1a            | ORF<br>1b        | ORF<br>2                       | ORF<br>3                  | ORF<br>4                       | ORF<br>5                       | ORF<br>6                      | ORF<br>7                  | ORF<br>8 | 3'<br>UTR    |
|---------------------|--------------------------------------------------------------------------------------------------------------------------------------------------------------------------------------------------------------------------------------------------------------------------------------------------------------------------------------------------------------------------------------------------------------------------------------------------------------------------------------------------------------------------------------------------------------------------------------|---------------------------|-----------|----------------------|------------------|--------------------------------|---------------------------|--------------------------------|--------------------------------|-------------------------------|---------------------------|----------|--------------|
| Pregotovirus        | OR131642-48,<br>MN161560,<br>OR131621-22,<br>MN161563,<br>MN161558,<br>MF351889,<br>MK722372,<br>MN161571,<br>MG752895,<br>KJ541759,<br>KJ935003,<br>OR131594-600,<br>OR131641,<br>MN161567,<br>MN161559,<br>OR131631-40,<br>MN161564,<br>MK182566,<br>OR131623-30,<br>MK722380,<br>MK722365,<br>MN161560,<br>MN161569,<br>OR131601-2,<br>MK722363,<br>MN161568,<br>MK722374,<br>MK722378,<br>MK722371,<br>MK722369,<br>MK722368,<br>MK722370,<br>MK722367,<br>MK722366,<br>MK722364,<br>MK722375,<br>MK722373,<br>MN161565,<br>OR131618-20,<br>OR131606-7,<br>MF685025,<br>KX184715 | Pythons,<br>Skink, Turtle | 1<br>β    | 15-18<br><i>PP1A</i> | 7<br><i>PP1B</i> | 2.8<br><i>S</i> <sub>(2)</sub> | 0.8<br>TM1 <sub>(3)</sub> | 0.7<br><i>M</i> <sub>(4)</sub> | 0.5<br><i>N</i> <sub>(5)</sub> | 0.9-1.2<br>TM2 <sub>(6)</sub> | 1.5<br>GP1 <sub>(7)</sub> | -        | 0.9<br>α & γ |

|                              |                                                                                                                                                            |                                   |                  |                      |                    |                                |                                |                                                                            |                                    |                                                    |                           |                         |                            |
|------------------------------|------------------------------------------------------------------------------------------------------------------------------------------------------------|-----------------------------------|------------------|----------------------|--------------------|--------------------------------|--------------------------------|----------------------------------------------------------------------------|------------------------------------|----------------------------------------------------|---------------------------|-------------------------|----------------------------|
| Lyctovirus<br>(N/A)          | MZ971349,<br>MZ971342,<br>MZ971345                                                                                                                         | N.Am.<br>Colubrids                | 1<br>$\beta$     | 14.5<br><i>PP1A</i>  | 7<br><i>PP1B</i>   | 2.9<br><i>S</i> <sub>(2)</sub> | 0.7<br>TM1 <sub>(3)</sub>      | 0.7<br><i>M</i> <sub>(4)</sub>                                             | 0.5<br><i>N</i> <sub>(5)</sub>     | 2<br>GP2 <sub>(6)</sub>                            | -                         | -                       | 0.8<br>$\gamma$            |
| Lyctovirus<br>(Rebatovirus)  | MG600030,<br>MG600029                                                                                                                                      | Chinese<br>Colubrids,<br>Nematode | 0.6<br>$\beta$   | 15.5<br><i>PP1A</i>  | 6.9<br><i>PP1B</i> | 2.9<br><i>S</i> <sub>(2)</sub> | 0.6<br>TM1 <sub>(3)</sub>      | 0.2-0.4<br>VP7 <sub>4</sub> /<br>VP13 <sub>4</sub>                         | 0.7<br><i>M</i> <sub>(5)</sub>     | 05<br><i>N</i> <sub>(6)</sub>                      | 2<br>GP2 <sub>(7)</sub>   | -                       | 0.6<br>$\gamma$            |
| Lyctovirus<br>(Chalatovirus) | MT997160                                                                                                                                                   | Chameleon                         | 0.3<br>$\beta$   | 17.2<br><i>PP1A</i>  | 7<br><i>PP1B</i>   | 2.9<br><i>S</i> <sub>(2)</sub> | 1.4<br>VP5 <sub>43</sub>       | 0.8<br><i>M</i> <sub>(4)</sub>                                             | 0.5<br><i>N</i> <sub>(5)</sub>     | 0.9<br>VP33 <sub>6</sub>                           | 0.3<br>VP12 <sub>7</sub>  | 0.2<br>VP7 <sub>8</sub> | 0.6<br>-                   |
| Vebetovirus                  | MT997159                                                                                                                                                   | Chameleon                         | 0.4<br>$\beta$   | 19.7<br><i>PP1A</i>  | 7<br><i>PP1B</i>   | 3.4<br><i>S</i> <sub>(2)</sub> | 0.3<br>VP12 <sub>3</sub>       | 0.9<br>VP34 <sub>4</sub>                                                   | 1.4<br><i>M</i> <sub>(5)</sub>     | 0.7<br><i>N</i> <sub>(6)</sub>                     | -                         | -                       | 1.4<br>$\gamma$            |
| Sectovirus                   | NC043490,<br>MG600031                                                                                                                                      | Chinese<br>Colubrids              | -                | >9.7?<br><i>PP1A</i> | 6.9<br><i>PP1B</i> | 3.1<br><i>S</i> <sub>(2)</sub> | 0.8-0.9<br>TM1 <sub>(3)</sub>  | 1-1.1<br>VP38 <sub>4</sub> /<br>VP43 <sub>4</sub>                          | 0.6<br><i>M</i> <sub>(5)</sub>     | 0.5<br><i>N</i> <sub>(6)</sub>                     | 1.5<br>GP1 <sub>(7)</sub> | 1<br>VP37 <sub>8</sub>  | 0.9<br>$\gamma$            |
| Septovirus                   | OR131608-17,<br>MN161566,<br>MZ971330-40,<br>MZ971304-5,<br>MZ971310-11,<br>MZ971279,<br>MZ971293,<br>MZ971285,<br>MZ971299-300,<br>MZ971286<br>OR131604-5 | Pythons                           | 1.2<br>$\beta$   | ~13.6<br><i>PP1A</i> | 6.5<br><i>PP1B</i> | 2.4<br><i>S</i> <sub>(2)</sub> | 0.8<br>TM1 <sub>(3)</sub>      | 0.6<br><i>M</i> <sub>(4)</sub>                                             | 0.4<br><i>N</i> <sub>(5)</sub>     | 0.2-0.3<br>VP8 <sub>6</sub> /<br>VP13 <sub>6</sub> | -                         | -                       | 1.1<br>$\alpha$ & $\gamma$ |
| Infratovirus                 | MZ971343,<br>MN161572,<br>KC883638,<br>KX883638,<br>MG600028                                                                                               | Colubrids,<br>Nematode            | 1-2.3<br>$\beta$ | ~15<br><i>PP1A</i>   | 6.8<br><i>PP1B</i> | 2.8<br><i>S</i> <sub>(2)</sub> | 1.4<br>TM1 <sub>(3)</sub>      | 0.2-0.4<br>VP7b <sub>4</sub> /<br>VP10 <sub>4</sub> /<br>VP13 <sub>4</sub> | 0.6-0.7<br><i>M</i> <sub>(5)</sub> | 0.5<br><i>N</i> <sub>(6)</sub>                     | -                         | -                       | 0.9<br>$\alpha$ & $\gamma$ |
| Sertovirus                   | MN161561,<br>MN161562                                                                                                                                      | Tree Boa                          | 0.4<br>$\beta$   | 13.5<br><i>PP1A</i>  | 6.8<br><i>PP1B</i> | 3.2<br><i>S</i> <sub>(2)</sub> | 0.6<br>TM1 <sub>(3)</sub>      | 0.6<br><i>M</i> <sub>(4)</sub>                                             | 0.4<br><i>N</i> <sub>(5)</sub>     | -                                                  | -                         | -                       | 1.6<br>-                   |
| Bostovirus*                  | NC027199                                                                                                                                                   | Bovine                            | 0.5<br>$\beta$   | 9.3<br><i>PP1A</i>   | 6<br><i>PP1B</i>   | 1.7<br><i>S</i> <sub>(2)</sub> | 0.6<br><i>M</i> <sub>(3)</sub> | 0.5<br><i>N</i> <sub>(4)</sub>                                             | 1.3<br>GP2 <sub>(5)</sub>          | 0.2<br>VP9 <sub>6</sub>                            | -                         | -                       | 0.3<br>$\gamma$            |
| Bafinivirus*                 | NC038295                                                                                                                                                   | Minnow                            | 0.8<br>$\beta$   | ~14.5<br><i>PP1A</i> | 7<br><i>PP1B</i>   | 3.6<br><i>S</i> <sub>(2)</sub> | 0.7<br><i>M</i> <sub>(3)</sub> | 0.5<br><i>N</i> <sub>(4)</sub>                                             | -                                  | -                                                  | -                         | -                       | 0.2<br>$\gamma$            |
| Oncotcha-<br>virus*          | NC026812                                                                                                                                                   | Salmon                            | 0.8<br>$\beta$   | ~14.5<br><i>PP1A</i> | 7<br><i>PP1B</i>   | 3.6<br><i>S</i> <sub>(2)</sub> | 0.7<br><i>M</i> <sub>(3)</sub> | 0.5<br><i>N</i> <sub>(4)</sub>                                             | -                                  | -                                                  | -                         | -                       | 0.2<br>$\gamma$            |
| Torovirus*                   | LC088094                                                                                                                                                   | Bovine                            | 0.7<br>$\beta$   | 13.2<br><i>PP1A</i>  | 6.8<br><i>PP1B</i> | 4.7<br><i>S</i> <sub>(2)</sub> | 0.7<br><i>M</i> <sub>(3)</sub> | 1.2<br>HE <sub>(5)</sub>                                                   | 0.3<br><i>N</i> <sub>(5)</sub>     | -                                                  | -                         | -                       | 0.2<br>$\alpha$            |

\*Non-Serpentovirus Outgroup

Common Proteins:

*PP1A* = Polyprotein 1A

*PP1B* =Polyprotein 1B

*S* = Spike

*M* =Matrix

*N* =Nucleoprotein
